# Supplementary material for: Amine- and blocked isocyanate-terminated polyurethane dendrimers: integrated synthesis, photophysical properties and application in a heat curable system
Source: Royal Society of Chemistry journal article supplement (doi:10.1039/c4ra12751j), 2014-12-04
Supplement: c4ra12751j1.pdf [file c4ra12751j1.pdf]

**Supporting Information:**

**Amine- and blocked isocyanate-terminated polyurethane dendrimers: Integrated synthesis, photophysical properties and application in a heat curable system.**

S.Veerapandian, A. Sultan Nasar

Department of Polymer Science, University of Madras, Guindy Campus, Chennai-600025, India.

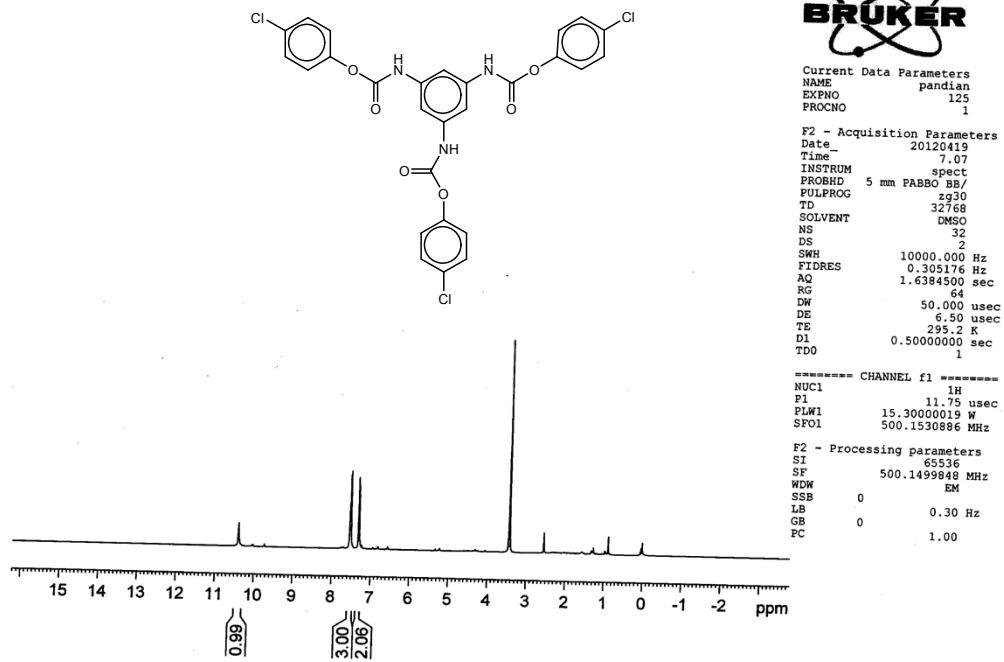

Figure S1: <sup>1</sup>H NMR Spectrum of core

Lab GSK  
alk-iii-102  
iitm\_carbonshort DMSO /opt/topspin iitm 12

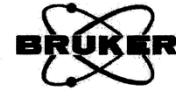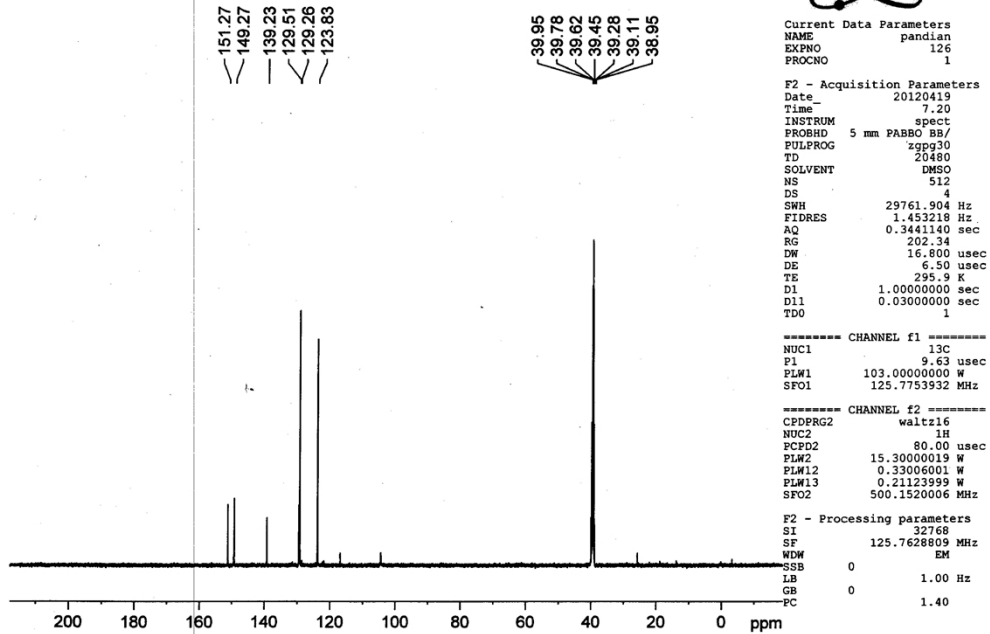

Figure S2:  $C^{13}$  NMR Spectrum of core

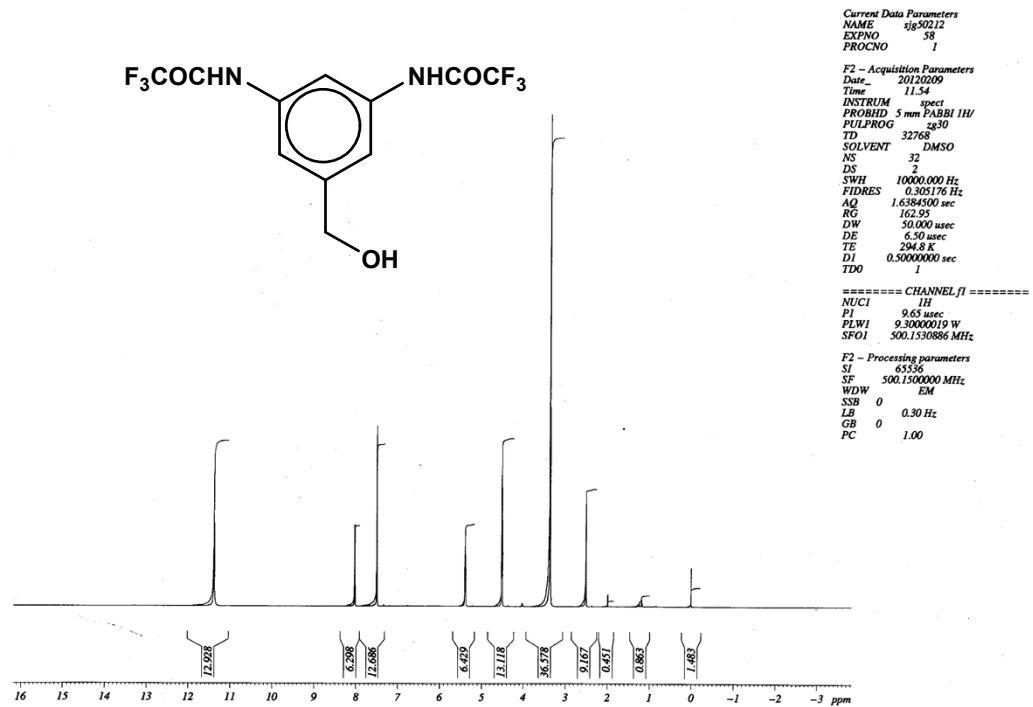

Figure S3:  $^1\text{H}$  NMR Spectrum of building block

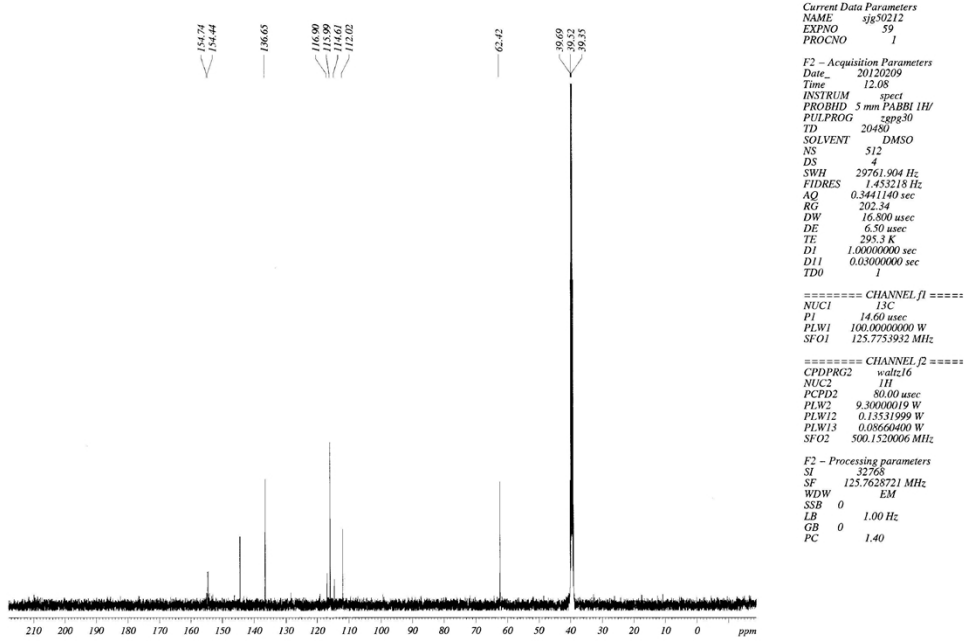

Figure S4 : <sup>13</sup>C NMR Spectrum of building block

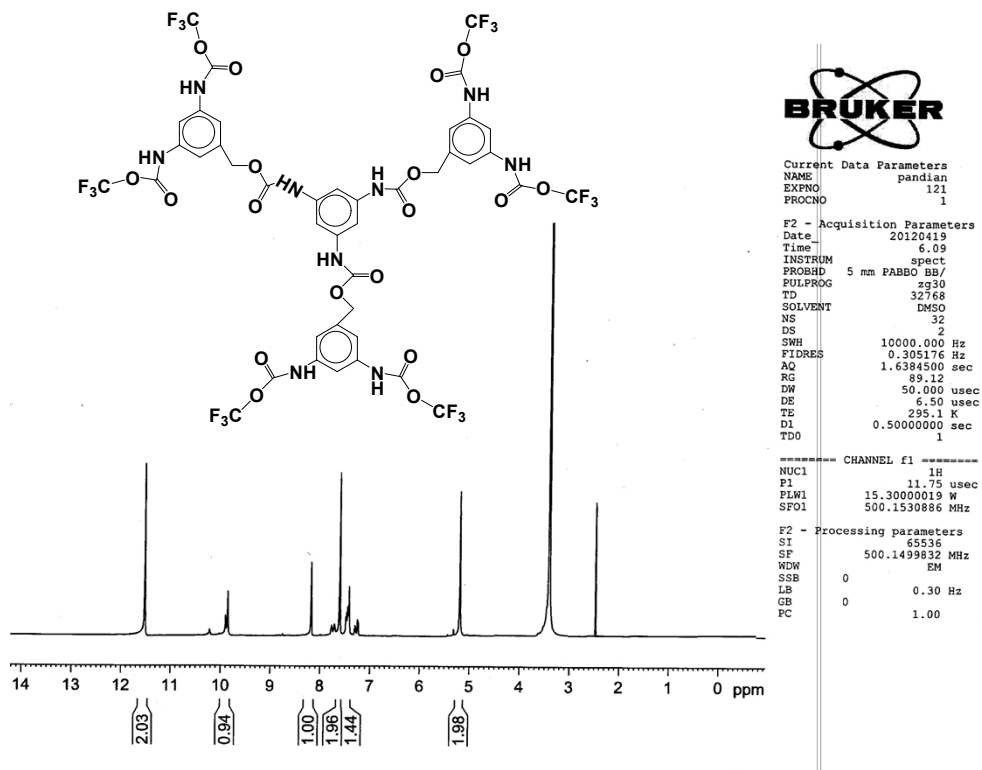

Figure S5: <sup>1</sup>H NMR Spectrum of G1 dendrimers with protected amine-end groups

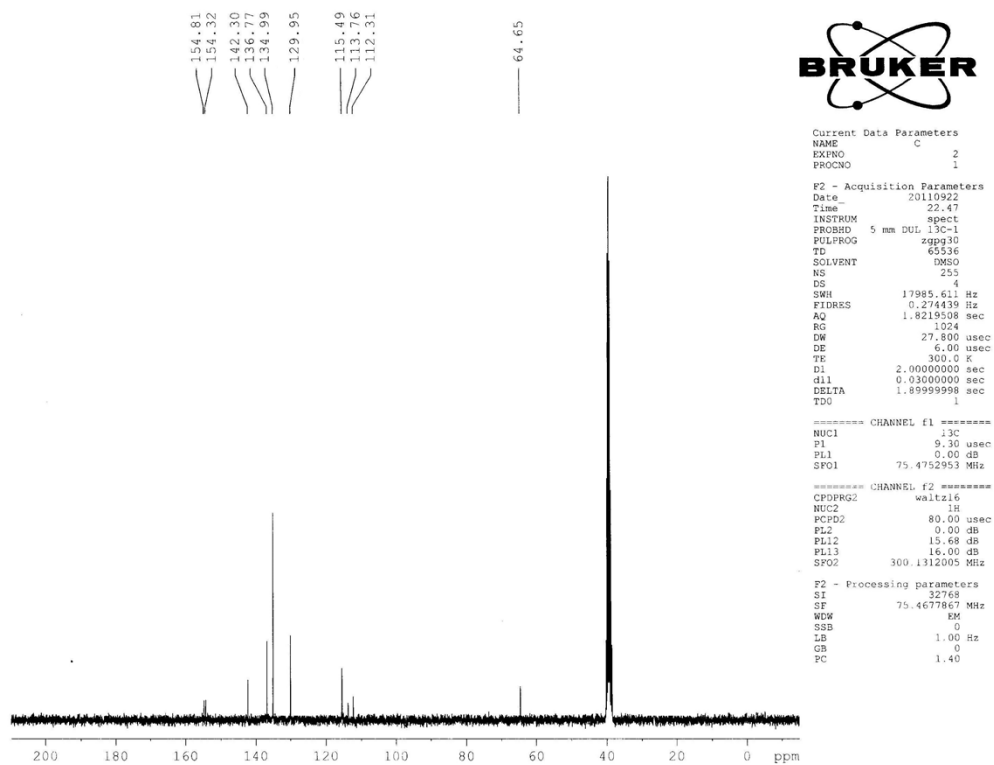

**Figure S6:  $C^{13}$  NMR Spectrum of G1 dendrimers with protected amine-end groups**

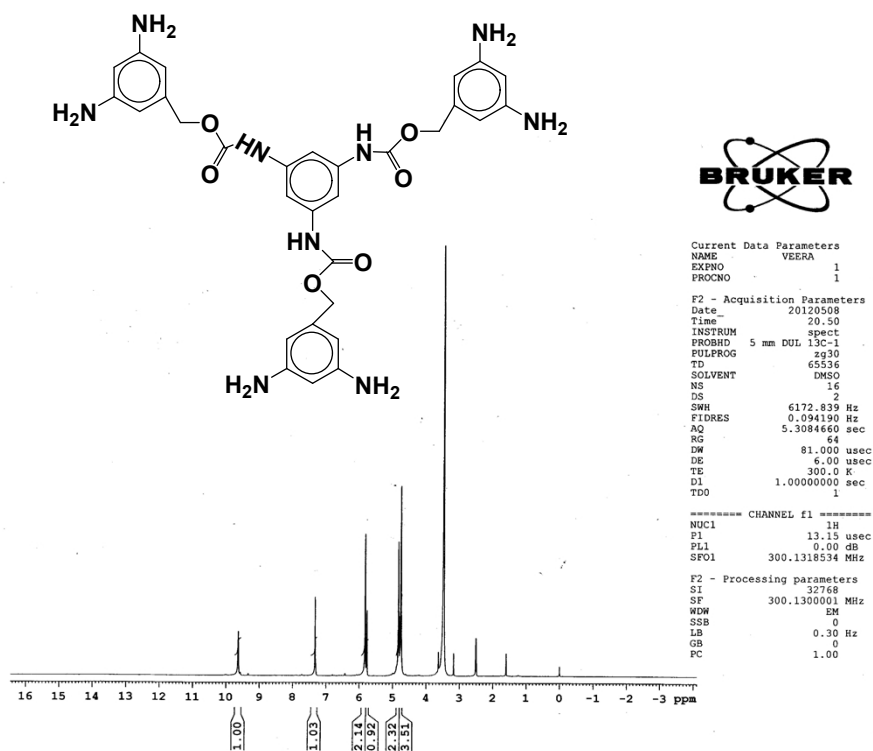

Figure S7:  $^1\text{H}$  NMR Spectrum of G1 dendrimers with amine-end groups



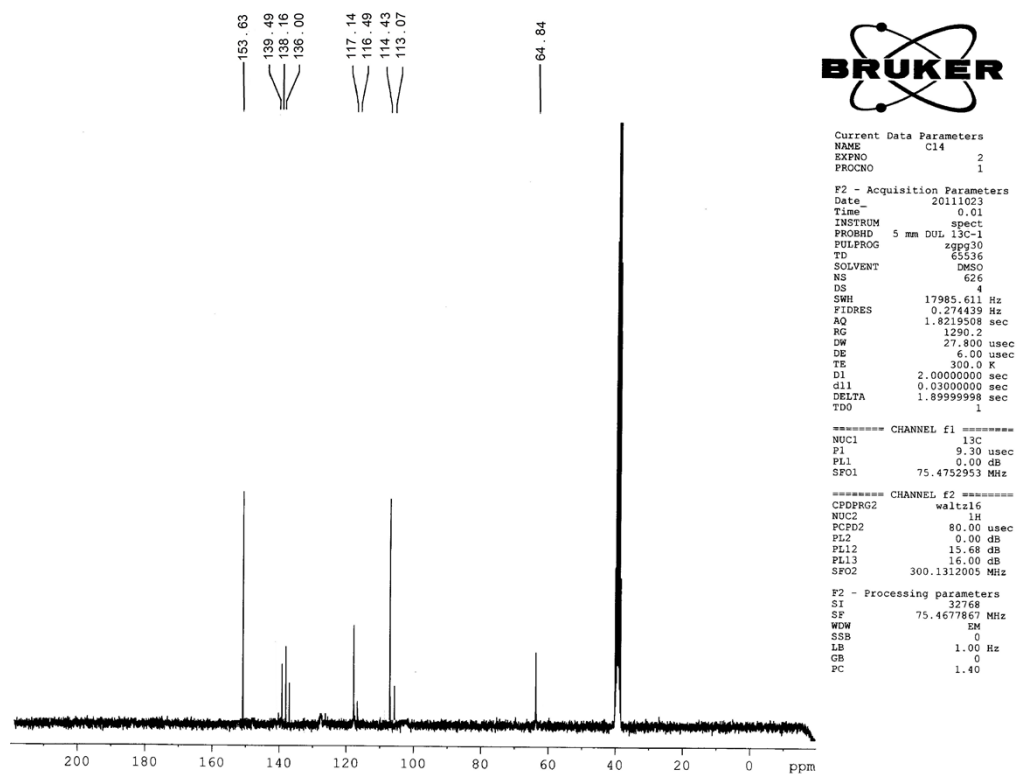

Figure S8:  $C^{13}$  NMR Spectrum of G1 dendrimers with amine-end groups

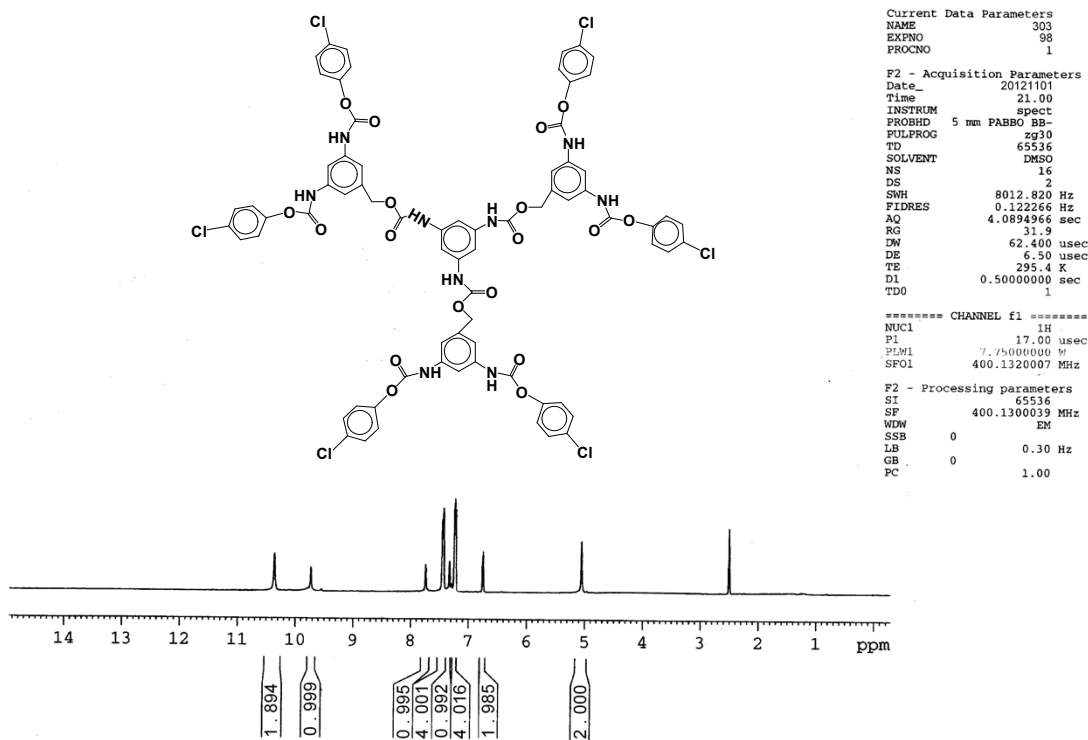

Figure S9:  $^1\text{H}$  NMR Spectrum of G1 dendrimers with blocked isocyanate end groups

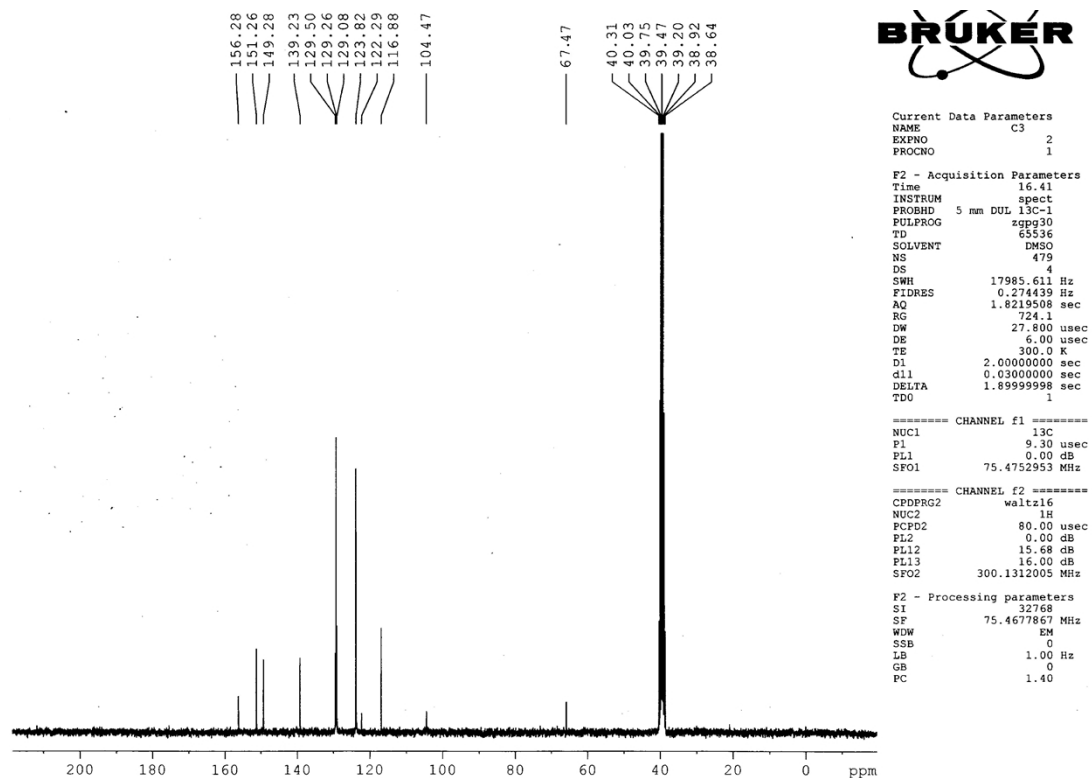

Figure S10:  $C^{13}$  NMR Spectrum of G1 dendrimers with blocked isocyanate-end groups

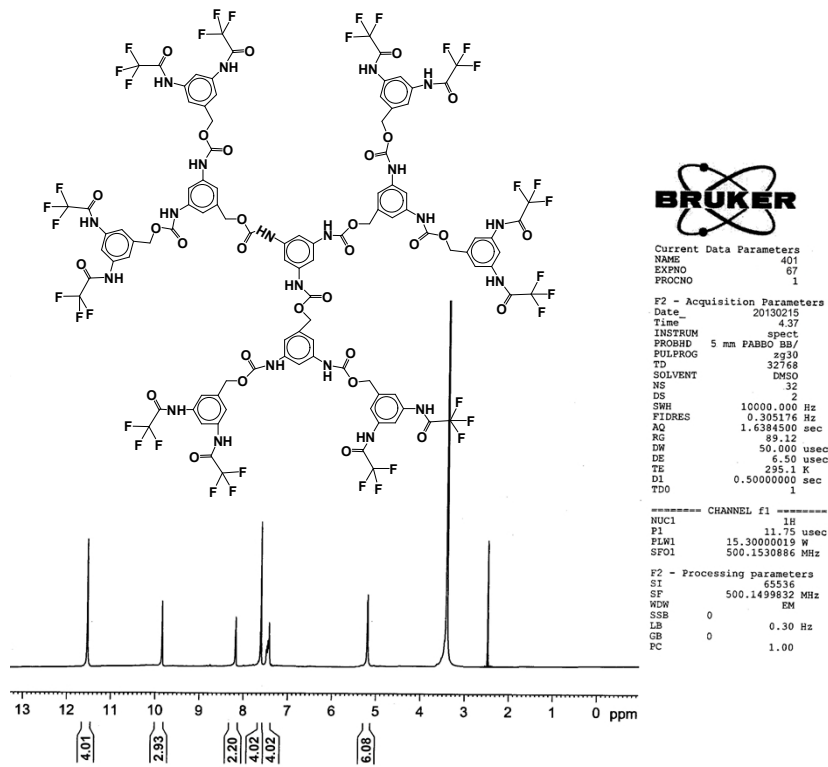

Figure S11:  $^1\text{H}$  NMR Spectrum of G2 dendrimers with protected amine-end groups

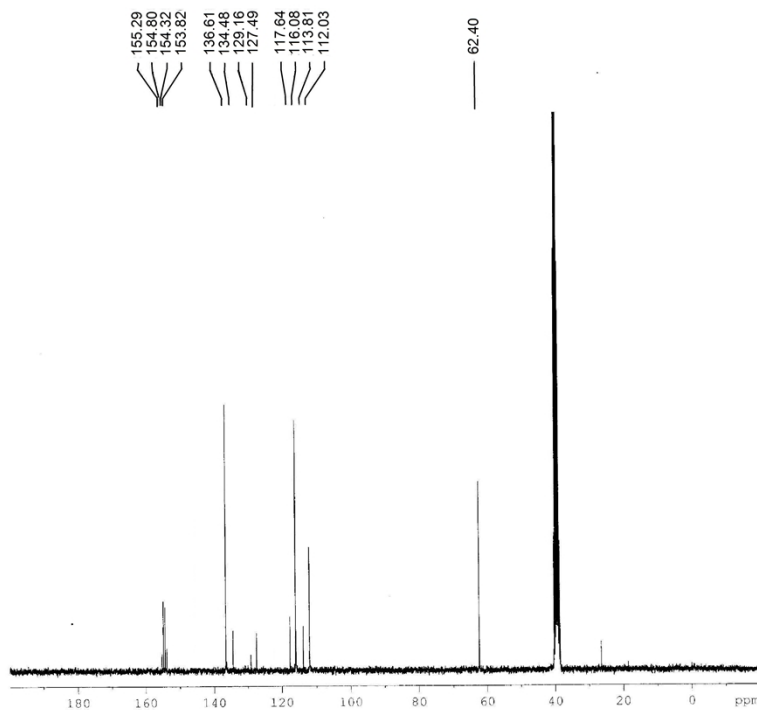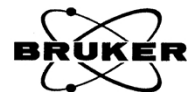

```

Current Data Parameters
NAME          RJV-2
EXPNO        2
PROCNO       1

F2 - Acquisition Parameters
Date_        20091221
Time         9.35
INSTRUM      spect
PROBHD       5 mm DUL 13C-1
PULPROG      zgpg30
TD           65536
SOLVENT      CDCl3
NS           437
DS           4
SWH          17985.611 Hz
FIDRES       0.274439 Hz
AQ           1.8219508 sec
RG           20642.5
DW           27.800 usec
DE           6.00 usec
TE           300.0 K
D1           2.0000000 sec
d11          0.0300000 sec
DELTA        1.8999998 sec
TDO          1

===== CHANNEL f1 =====
NUC1          13C
P1            8.10 usec
PL1           -2.00 dB
SFO1          75.4752953 MHz

===== CHANNEL f2 =====
CPDPRG2      waltz16
NUC2          1H
PCPD2        80.00 usec
PL2           0.00 dB
PL12         16.19 dB
PL13         16.00 dB
SFO2          300.1312005 MHz

F2 - Processing parameters
SI            32768
SF            75.4677490 MHz
WDW           EM
SSB           0
LB            1.00 Hz
GB            0
PC            1.40

```

Figure S12:  $C^{13}$  NMR Spectrum of G2 dendrimers with protected amine-end groups

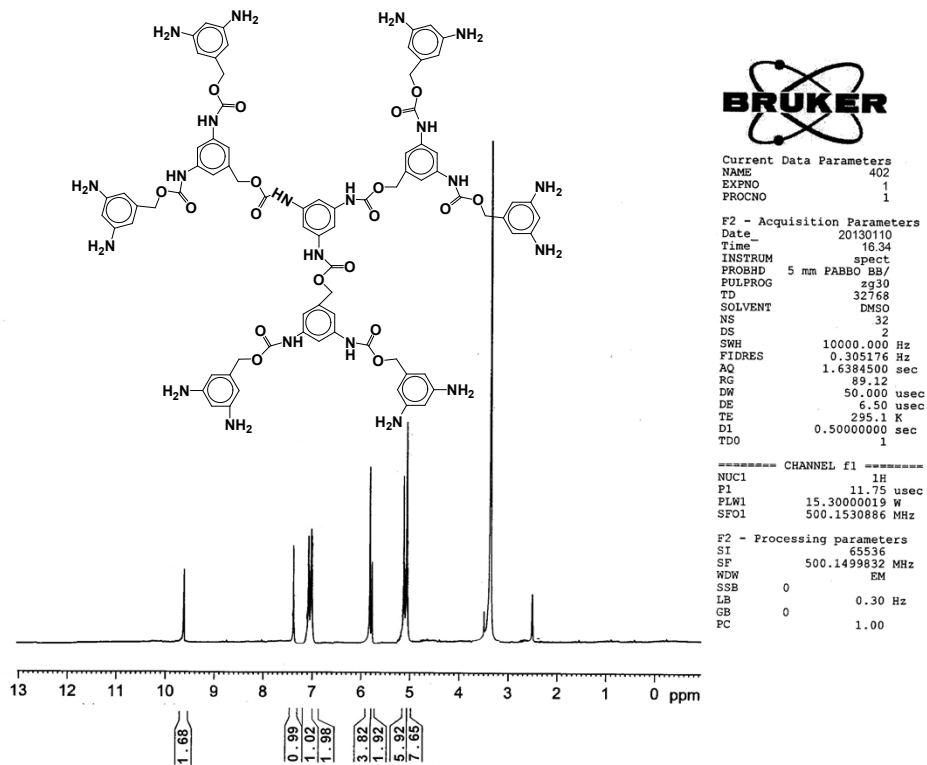

Figure S13:  $^1\text{H}$  NMR Spectrum of G2 dendrimers with amine-end groups

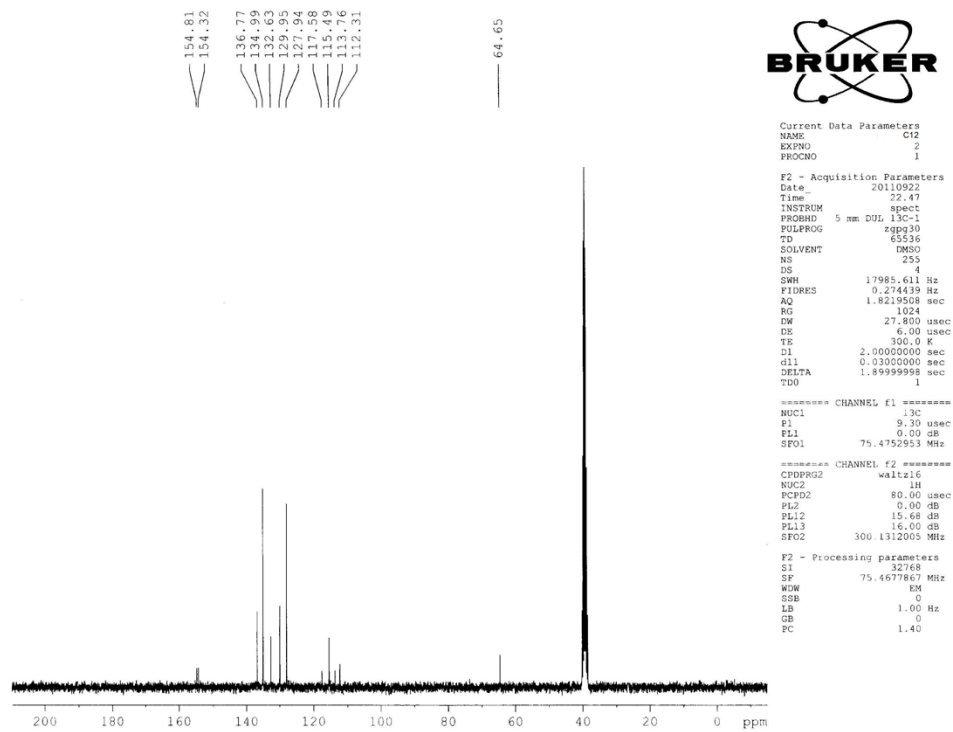

Figure S14:  $C^{13}$  NMR Spectrum of G2 dendrimers with amine-end groups

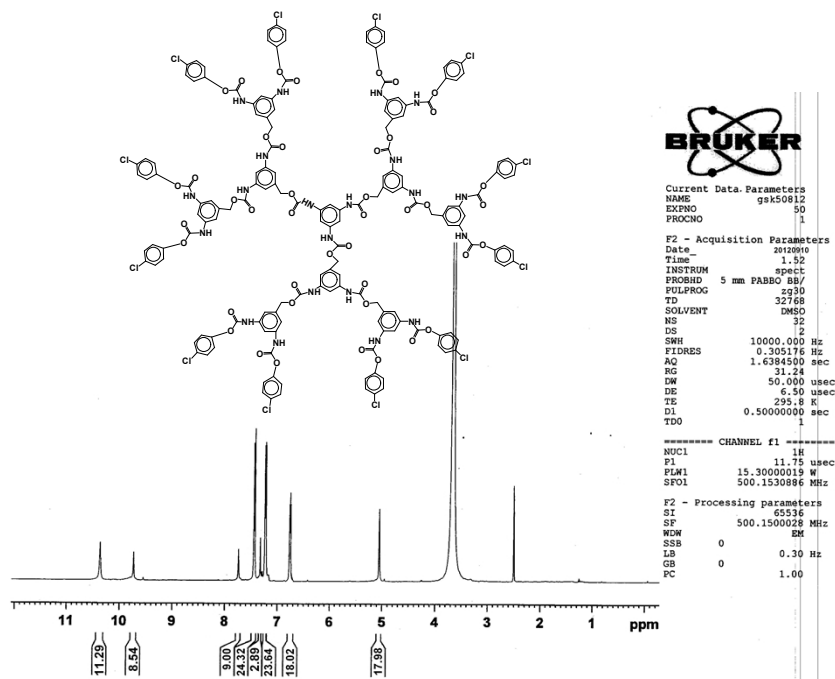

Figure S15:  $^1\text{H}$  NMR Spectrum of G2 dendrimers with blocked isocyanate-end groups



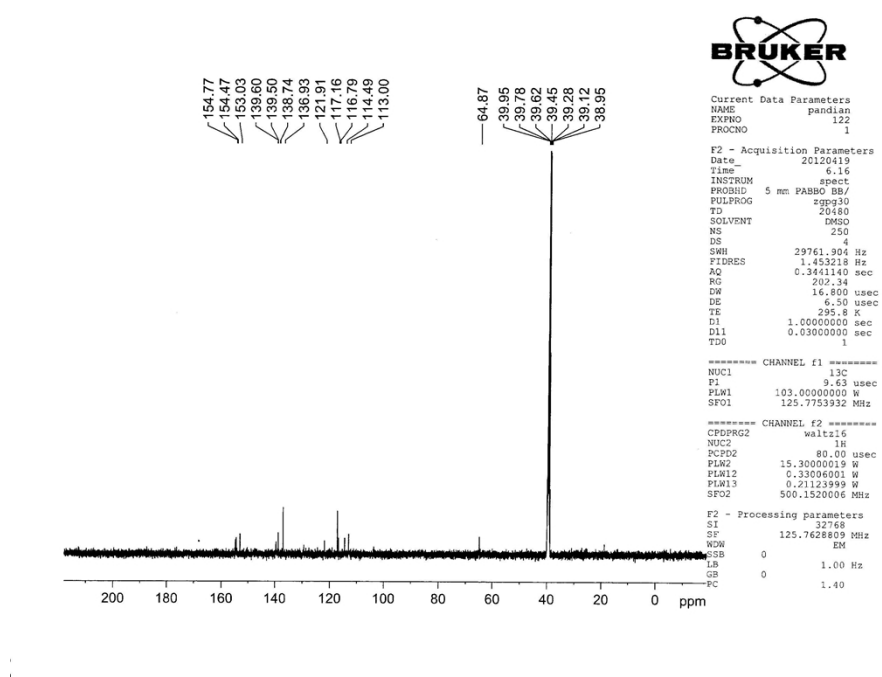

Figure S16:  $C^{13}$  NMR Spectrum of G2 dendrimers with blocked isocyanate-end groups

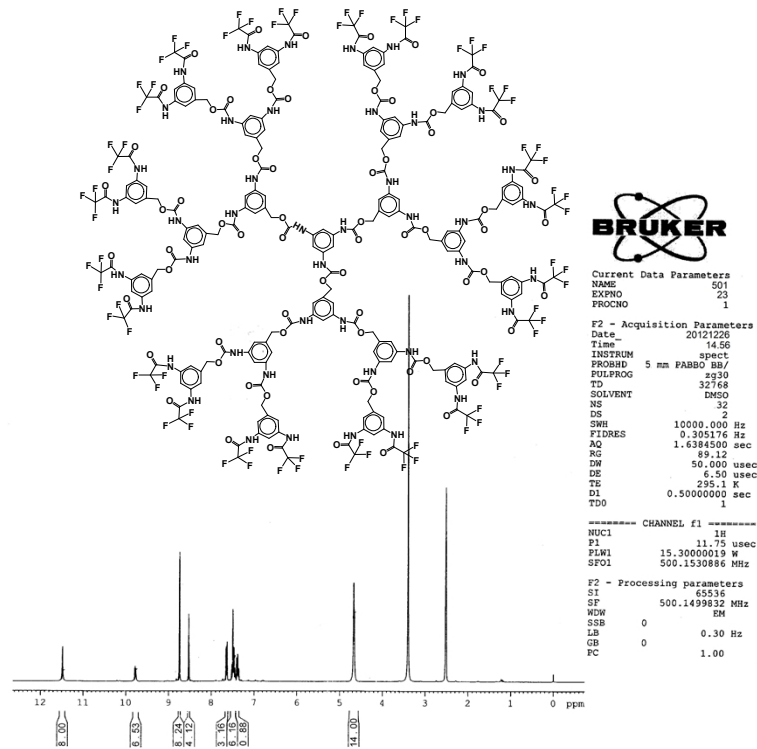

Figure S17:  $^1\text{H}$  NMR Spectrum of G3 dendrimers with protected amine-end groups

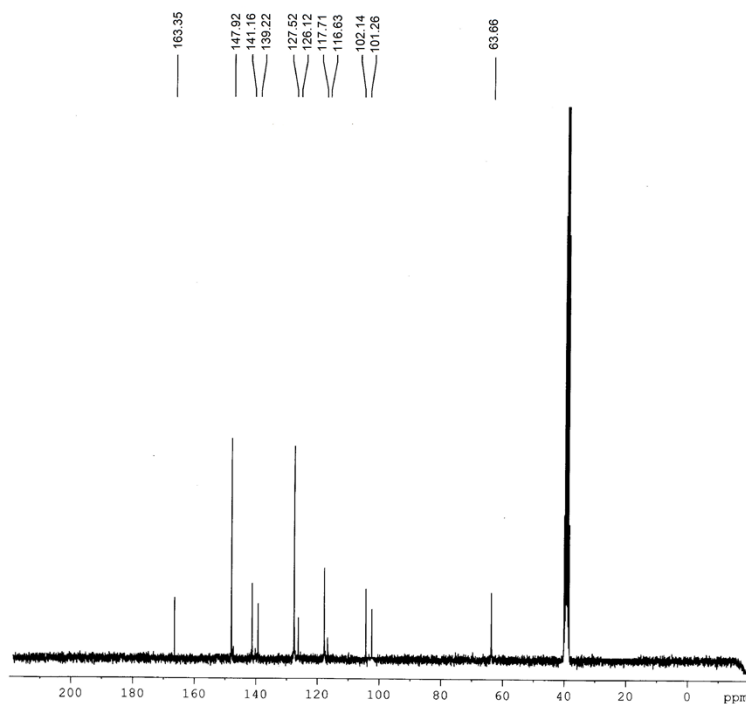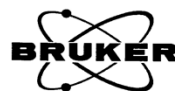

```

Current Data Parameters
NAME          1
EXPNO        2
PROCNO       1

F2 - Acquisition Parameters
Date_        20120117
Time         0.01
INSTRUM      spect
PROBHD       5 mm DUL 13C-1
PULPROG      zgpg30
TD           65536
SOLVENT      DMSO
NS           624
DS           4
SWH          17985.611 Hz
FIDRES       0.274439 Hz
AQ           1.8219508 sec
RG           1290.2
DW           27.800 usec
DE           6.00 usec
TE           300.0 K
D1           2.0000000 sec
d11          0.0300000 sec
DELTA        1.89999998 sec
TDO          1

===== CHANNEL f1 =====
NUC1          13C
P1            9.30 usec
PL1           0.00 dB
SFO1          75.4752953 MHz

===== CHANNEL f2 =====
CPDPRG2      waltz16
NUC2          1H
PCPD2        80.00 usec
PL2           0.00 dB
PL12         15.68 dB
PL13         16.00 dB
SFO2          300.1312005 MHz

F2 - Processing parameters
SI            32768
SF            75.4677867 MHz
WDW           EM
SSB           0
LB            1.00 Hz
GB            0
CB            0
PC            1.40

```

Figure S18:  $C^{13}$  NMR Spectrum of G3 dendrimers with protected amine-end groups

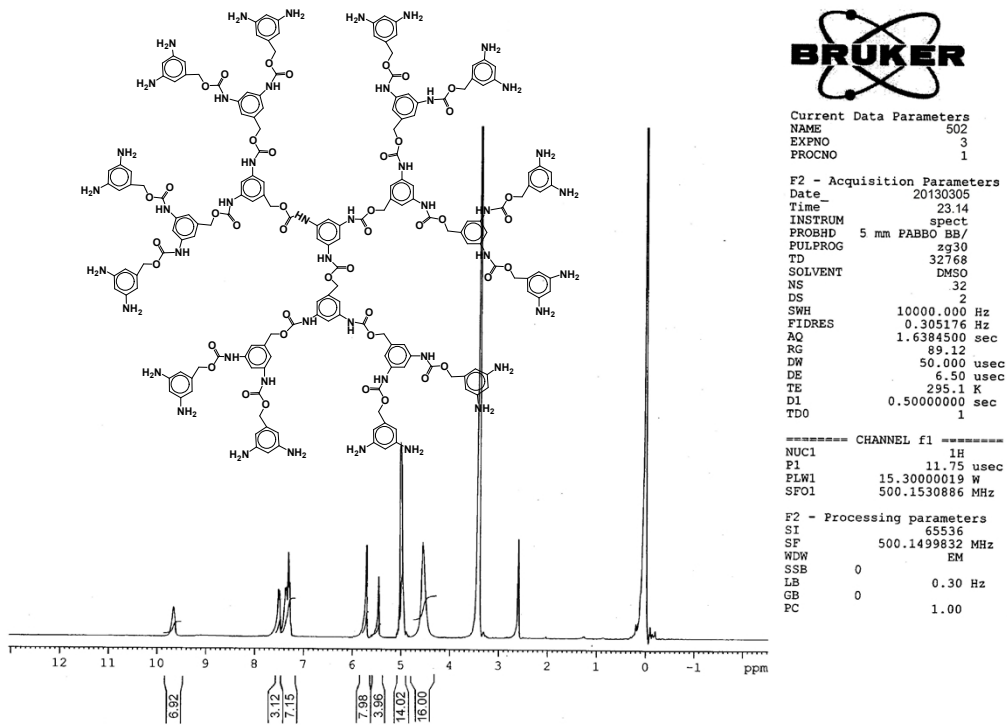

Figure S19:  $^1\text{H}$  NMR Spectrum of G3 dendrimers with amine-end groups

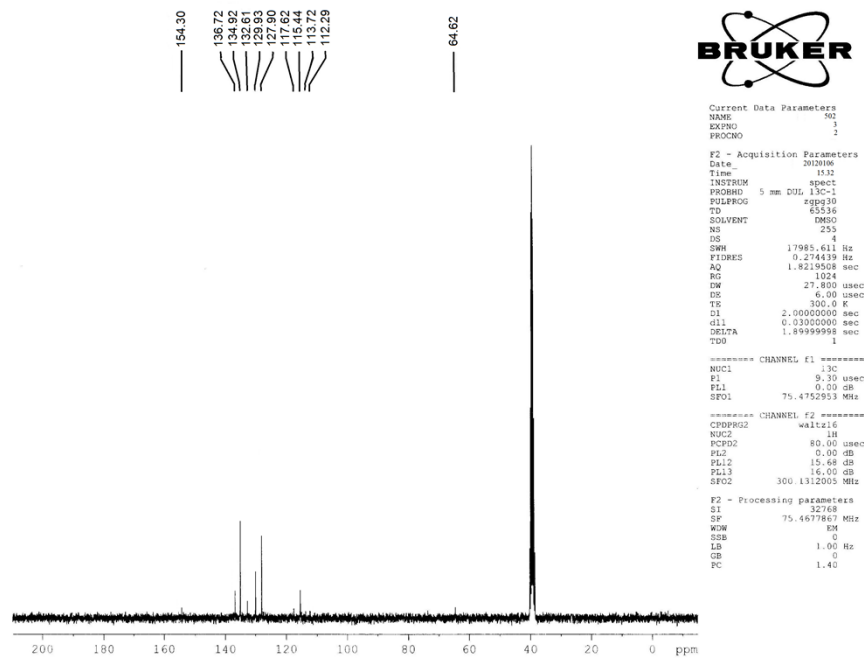

Figure S20:  $C^{13}$  NMR Spectrum of G3 dendrimers with amine-end groups

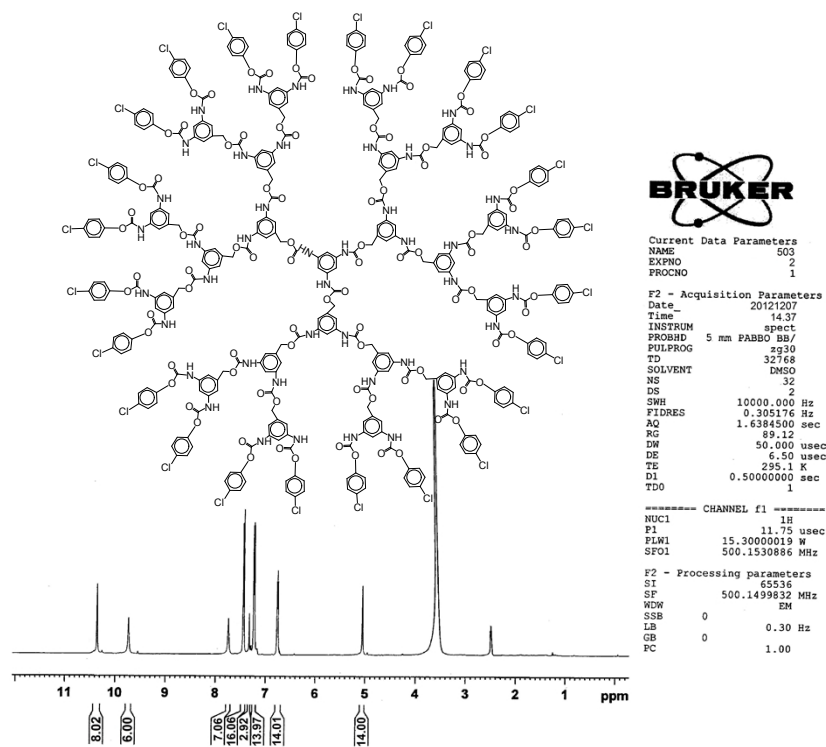

Figure S21:  $^1\text{H}$  NMR Spectrum of G3 dendrimers with blocked isocyanate-end groups

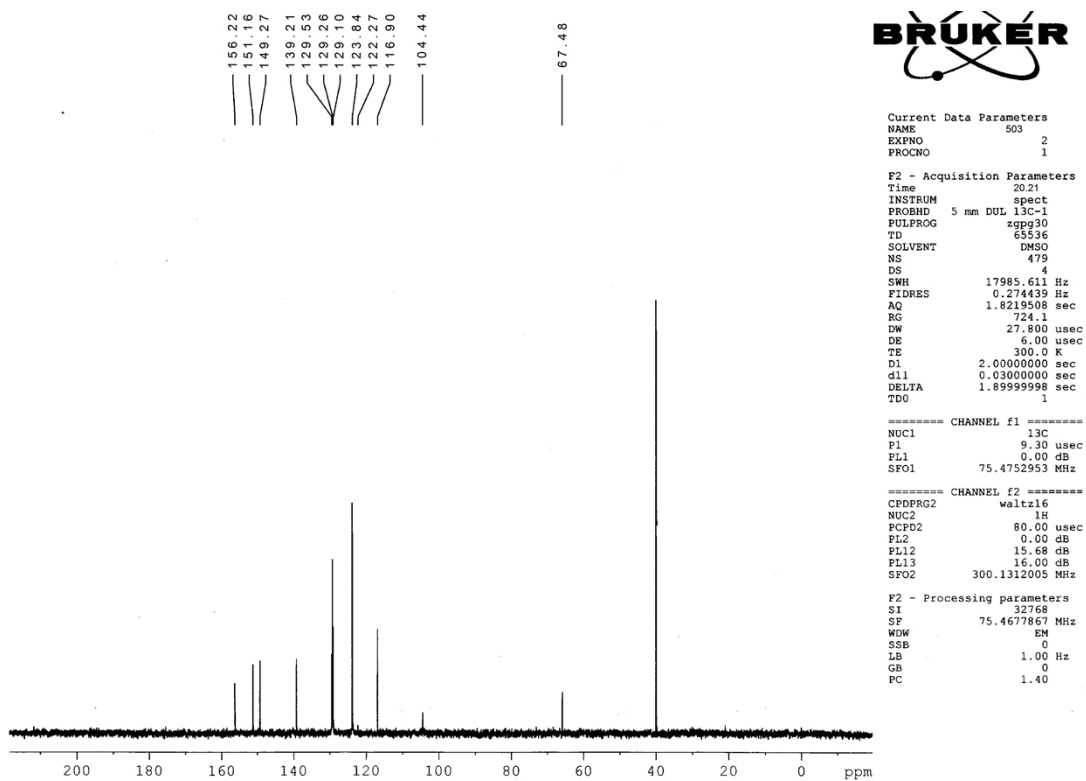

Figure S22:  $C^{13}$  NMR Spectrum of G3 dendrimers with blocked isocyanate-end groups

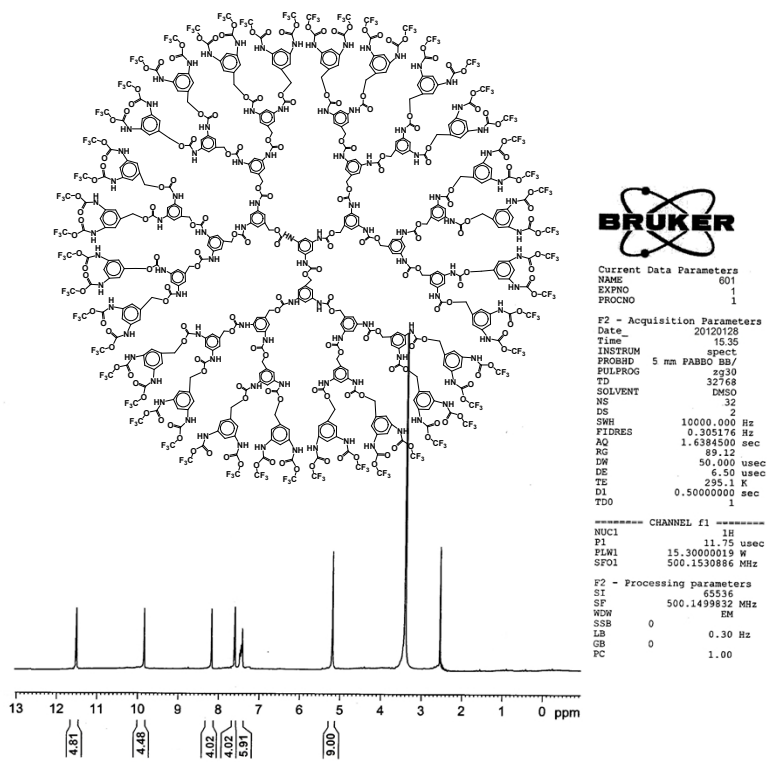

Figure S23:  $^1\text{H}$  NMR Spectrum of G4 dendrimers with protected amine-end groups



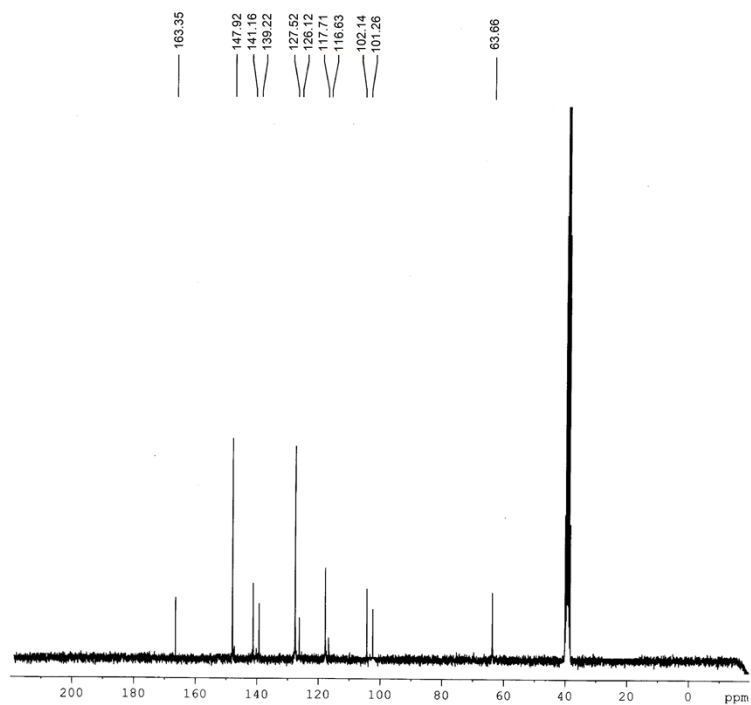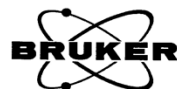

```

Current Data Parameters
NAME          601
EXPNO         2
PROCNO        1

F2 - Acquisition Parameters
Date_         2010117
Time          0.01
INSTRUM       spect
PROBHD        5 mm DUL 13C-1
PULPROG       zgpg30
TD            65536
SOLVENT       DMSO
NS            626
DS            4
SWH           17985.611 Hz
FIDRES        0.274439 Hz
AQ            1.8219508 sec
RG            1290.2
DW            27.800 usec
DE            6.00 usec
TE            300.0 K
D1            2.0000000 sec
d11           0.0300000 sec
DELTA         1.89999998 sec
TD0           1

===== CHANNEL f1 =====
NUC1          13C
P1            9.30 usec
PL1           0.00 dB
SFO1          75.4752953 MHz

===== CHANNEL f2 =====
CPDPRG2       waltz16
NUC2          1H
PCPD2         80.00 usec
PL2           0.00 dB
PL12          15.68 dB
PL13          16.00 dB
SFO2          300.1312005 MHz

F2 - Processing parameters
SI            32768
SF            75.4677867 MHz
WDW           EM
SSB           0
LB            1.00 Hz
GB            0
PC            1.40

```

Figure S24:  $C^{13}$  NMR Spectrum of G4 dendrimers with protected amine-end groups

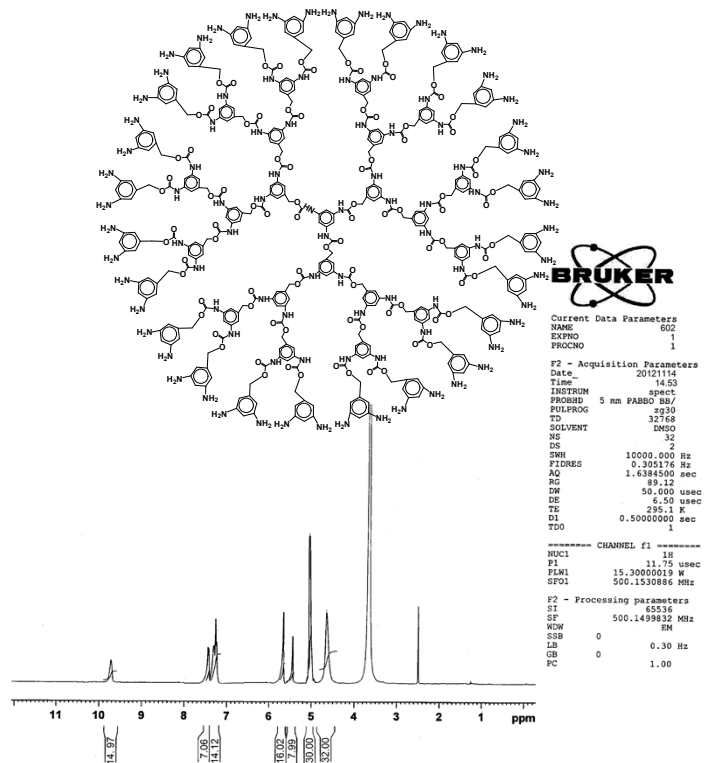

Figure S25:  $^1\text{H}$  NMR Spectrum of G4 dendrimers with amine-end groups

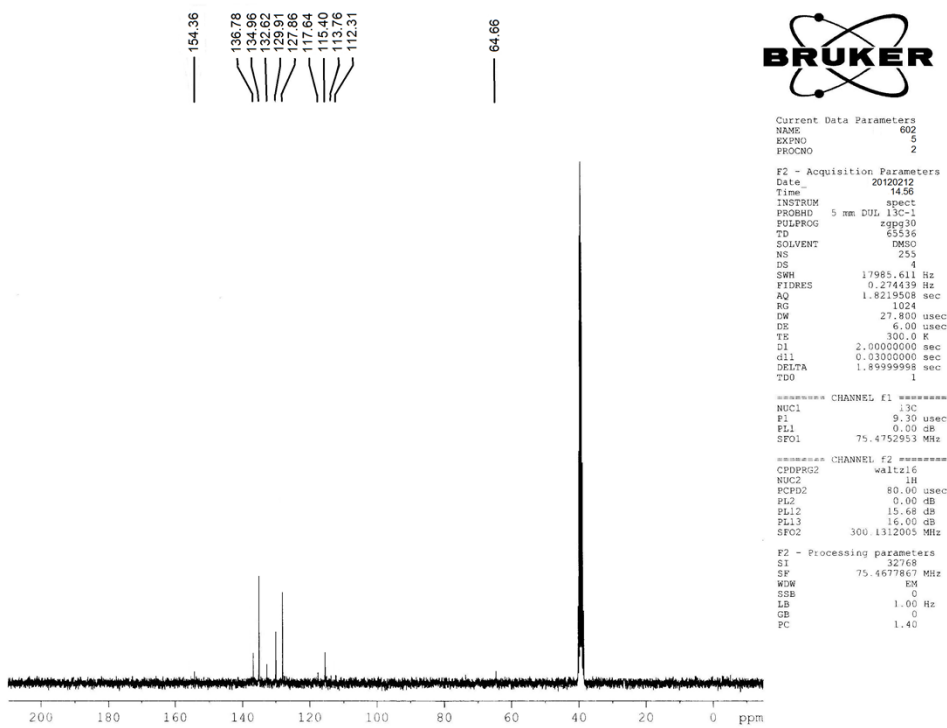

Figure S26:  $C^{13}$  NMR Spectrum of G4 dendrimers with amine-end groups

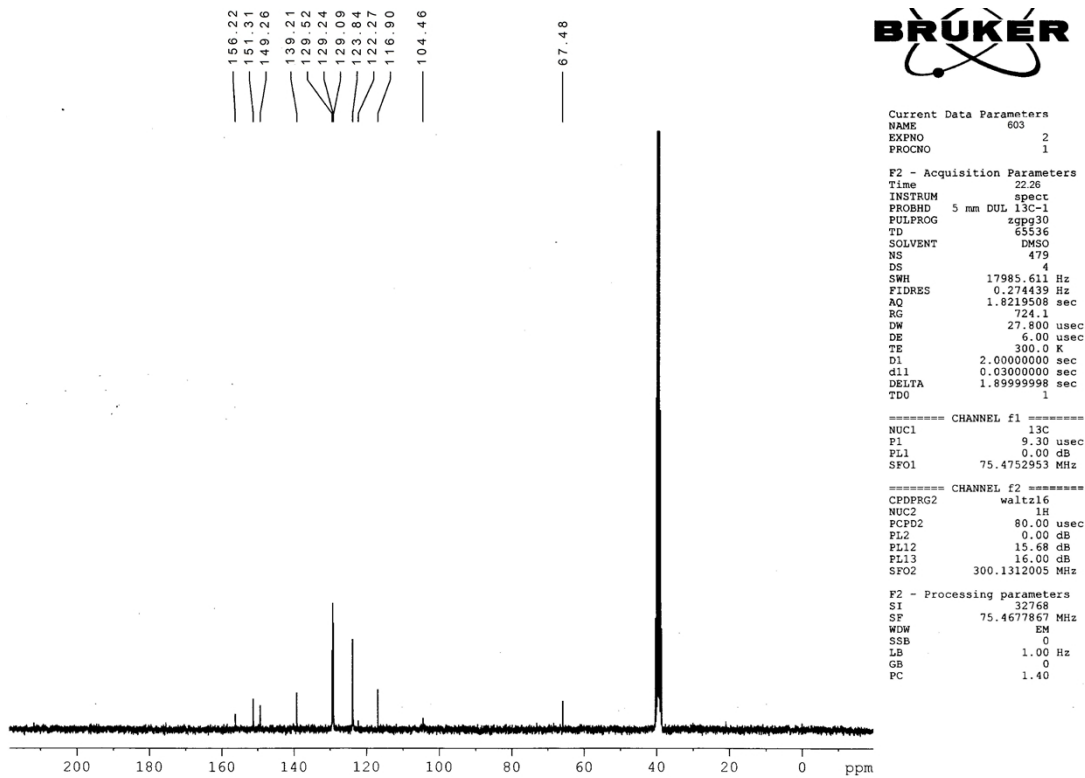

Figure S27:  $C^{13}$  NMR Spectrum of G4 dendrimers with blocked isocyanate-end groups

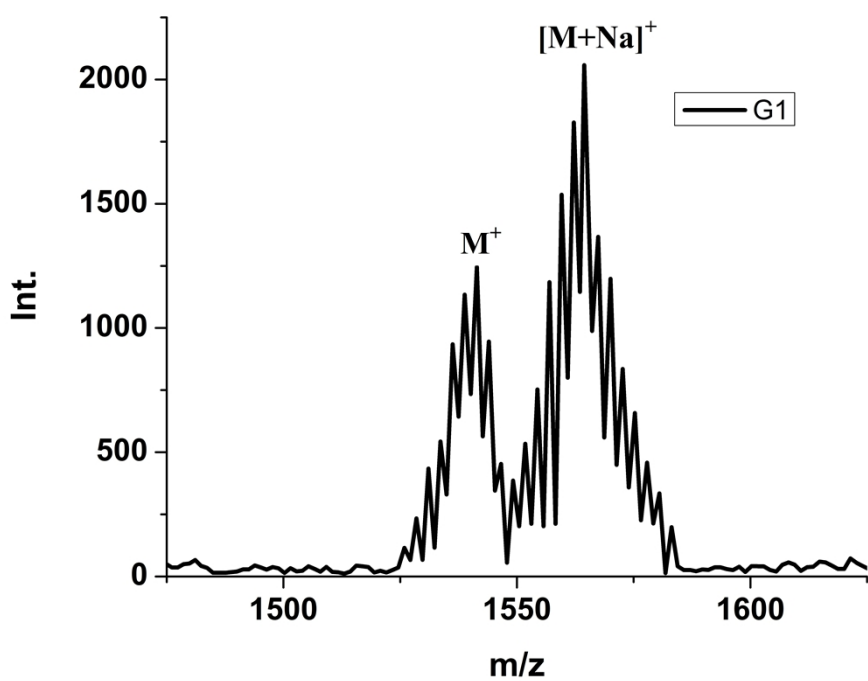

**Figure S28: Isotopes distribution pattern of G1 blocked isocyanate terminated polyurethane dendrimer**

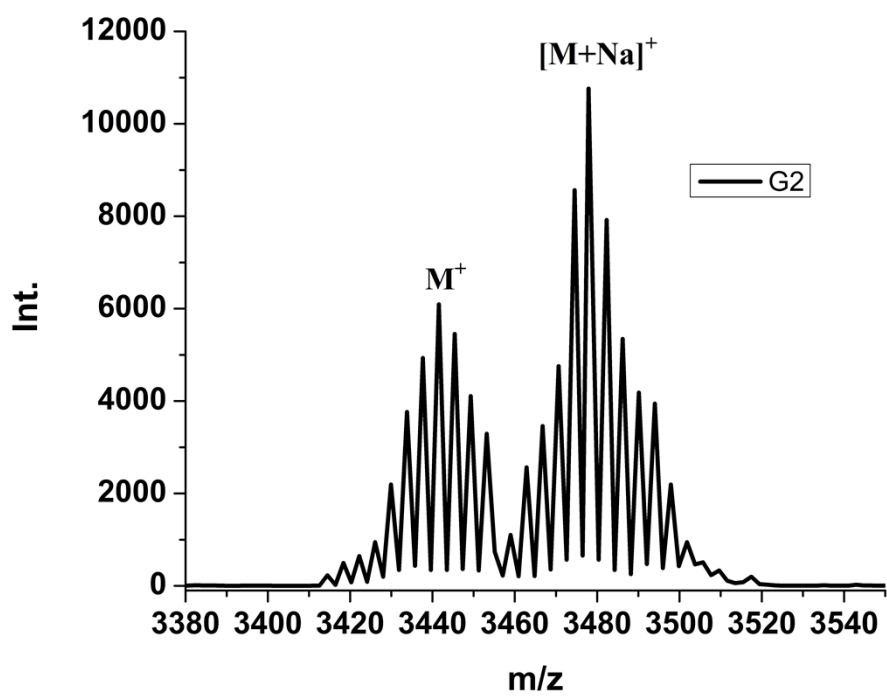

**Figure S29: Isotopes distribution pattern of G2 blocked isocyanate terminated polyurethane dendrimer**

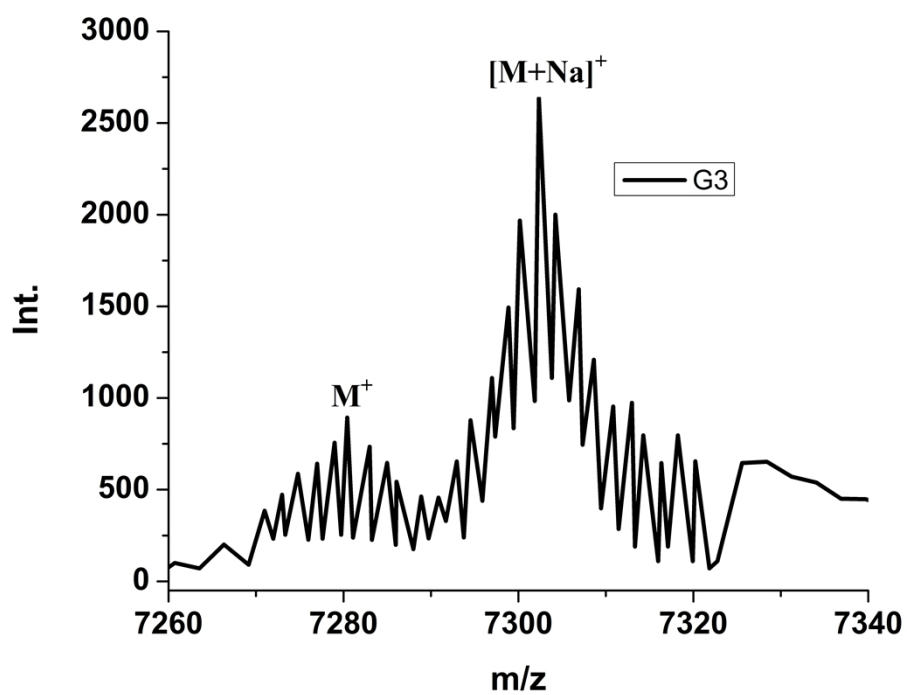

**Figure S30: Isotopes distribution pattern of G3 blocked isocyanate terminated polyurethane dendrimer**

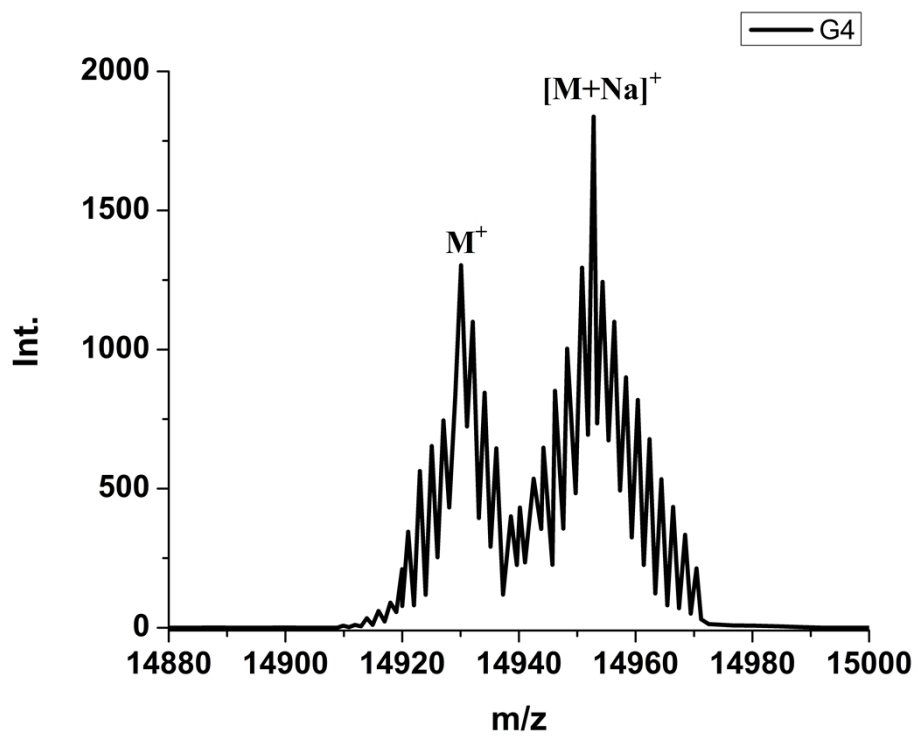

**Figure S31: Isotopes distribution pattern of G3 blocked isocyanate terminated polyurethane dendrimer**
